# Supplementary material
Source: publisher site journal article supplement (https://www.dovepress.com/article/375652)
Supplement: Supplementary file 1 [file get_supplementary_file.php]

**Supplemental Appendix**: Articles included in Review.

Category: Patient outcomes (n=7, 17%)

| Title | Study design | Publication Year |
| --- | --- | --- |
| Maternity Care for Pregnant Women with Opioid Use Disorder: A Review 1 | Qualitative review | 2019 |
| Methadone and buprenorphine discontinuation among postpartum women with opioid use disorder 2 | Retrospective | 2021 |
| Psychiatric comorbidities and their treatment predict buprenorphine continuation among postpartum people with opioid use disorder 3 | Chart review | 2022 |
| The association of cannabis use late in pregnancy with engagement and retention in perinatal substance use disorder care for opioid use disorder:  A cohort comparison 4 | Cohort study | 2020 |
| Association of State Child Abuse Policies and Mandated Reporting Policies With Prenatal and Postpartum Care Among Women Who Engaged in Substance Use During Pregnancy 5 | Cross sectional | 2022 |
| Correlates of Treatment Retention and Opioid Misuse Among Postpartum Women in Methadone Treatment 6 | Chart review | 2019 |
| Maternal and infant characteristics associated with maternal opioid overdose in the year following delivery 7 | Retrospective | 2020 |

Category: Provider/patient experience (n=12, 29%)

| Title | Study design | Publication Year |
| --- | --- | --- |
| The Lived Experience of Postpartum Women Attending Outpatient Substance Treatment for Opioid or Heroin Use 8 | Qualitative study | 2021 |
| Community-led Priority Setting for Opioid Use Disorder in Pregnancy and Parenting 9 | Qualitative study | 2021 |
| Motherhood, substance use and peer support: Benefits of an integrated group program for pregnant and postpartum women 10 | Qualitative study | 2021 |
| Nurses' Priorities for Improving Pregnancy and Birth Care for Individuals with Opioid use Disorder 11 | Qualitative study | 2021 |
| Engagement in perinatal outpatient services among women in recovery from opioid use disorders 12 | Qualitative study | 2021 |
| "You have to take this medication, but then you get punished for taking it:" lack of agency, choice, and fear of medications to treat opioid use disorder across the perinatal period 13 | Qualitative study | 2022 |
| Initiation and Engagement with Methadone Treatment among Pregnant and Postpartum Women14 | Qualitative study | 2017 |
| "A good mother": Impact of motherhood identity on women's substance use and engagement in treatment across the lifespan15 | Qualitative study | 2021 |
| Engagement in Early Intervention Services Among Mothers in Recovery From Opioid Use Disorders16 | Qualitative study | 2020 |
| Engagement in Online Communities by New Mothers in Recovery from Opioid Use Disorder17 | Qualitative study | 2023 |
| In their own words: a qualitative study of factors promoting resilience and recovery among postpartum women with opioid use disorders 18 | Qualitative study | 2020 |
| 28-year-old Woman With Opioid Use Disorder Delivers Healthy Baby While in Custody: Addressing Forced Detox19 | Case study | 2019 |

Category: Review article (n=4, 10%)

| Title | Study design | Publication Year |
| --- | --- | --- |
| Opioid use in pregnancy: An emerging health crisis20 | Qualitative review | 2021 |
| Pain, Opioids, and Pregnancy: Historical Context and Medical Management21 | Qualitative review | 2019 |
| Low barrier perinatal psychiatric care for patients with substance use disorder: meeting patients across the perinatal continuum where they are22 | Qualitative review | 2021 |
| Advancing preventive interventions for pregnant women who are opioid using via the integration of addiction and mental health research23 | Qualitative review | 2020 |

Category: Service delivery (n=18, 44%)

| Addressing opioid use disorder among rural pregnant and postpartum women: a study protocol24 | Implementation study | 2020 |
| --- | --- | --- |
| The Impact of a Multidisciplinary Opioid Use Disorder Prenatal Clinic on Breastfeeding Rates and Postpartum Care25 | Cohort study | 2022 |
| Coordinating Outpatient Care for Pregnant and Postpartum Women with Opioid Use Disorder: Implications from the COACHH Program26 | Qualitative study | 2019 |
| Obstetric management of women with opioid use disorder27 | Qualitative review | 2019 |
| A review of nonpharmacological adjunctive treatment for postpartum women with opioid use disorder28 | Qualitative review | 2020 |

| Does co-location of medication assisted treatment and prenatal care for women with opioid use disorder increase pregnancy planning, length of interpregnancy interval, and postpartum contraceptive uptake?29 | Chart review | 2019 |
| --- | --- | --- |
| Support Models for Addiction Related Treatment (SMART) for pregnant women: Study protocol of a cluster randomized trial of two treatment models for opioid use disorder in prenatal clinics30 | Chart review | 2022 |
| A pilot multisite study of patient navigation for pregnant women with opioid use disorder31 | Randomized clinical/control trial | 2019 |
| Reducing sexual health risks and substance use in the prenatal setting: A study protocol for a randomized controlled trial32 | Randomized clinical/control trial | 2019 |
| Leveraging Telehealth in the United States to Increase Access to Opioid Use Disorder Treatment in Pregnancy and Postpartum During the COVID-19 Pandemic33 | Case study | 2021 |
| A statewide quality improvement (QI) initiative for better health outcomes and family stability among pregnant women with opioid use disorder (OUD) and their infants34 | Cohort study | 2019 |

| Evaluation of a Nurse-Led Program for Rural Pregnant Women with Opioid Use Disorder to Improve Maternal-Neonatal Outcomes35 | Retrospective | 2019 |
| --- | --- | --- |
| Postpartum Care Visit Attendance Within 60 Days of Delivery Among Women with and Without Opioid Use During Pregnancy: An Analysis of Commercial Insurance Data36 | Retrospective | 2023 |
| A Cohort Comparison of Differences Between Regional and Buncombe County Patients of a Comprehensive Perinatal Substance Use Disorders Program in Western North Carolina37 | Retrospective | 2020 |
| Optimizing Pregnancy Treatment Interventions for Moms (OPTI-Mom): A Pilot Study38 | Case study | 2018 |

| Do Maternity Care Coordination Services Encourage Use of Behavioral Health Treatment among Pregnant Women on Medicaid?39 | Retrospective | 2017 |
| --- | --- | --- |
| The effect of integrating substance abuse treatment with prenatal care on birth outcome40 | Prospective | 2000 |
| Role-modeling healthy behavior: peer counseling for pregnant and postpartum women in recovery41 | Qualitative review | 1998 |

References

1. Rizk AH, Simonsen SE, Roberts L, Taylor‐Swanson L, Lemoine JB, Smid M. Maternity Care for Pregnant Women with Opioid Use Disorder: A Review. *J Midwifery Womens Health*. 2019;64(5):532-544. doi:10.1111/jmwh.13019

2. Schiff DM, Nielsen TC, Hoeppner BB, et al. Methadone and buprenorphine discontinuation among postpartum women with opioid use disorder. *Am J Obstet Gynecol*. 2021;225(4):424.e1-424.e12. doi:10.1016/j.ajog.2021.04.210

3. Shadowen H, Violante S, Gataric A, Goulding AN, Martin CE. Psychiatric comorbidities and their treatment predict buprenorphine continuation among postpartum people with opioid use disorder. *Drug Alcohol Depend Rep*. 2022;5:100121. doi:10.1016/j.dadr.2022.100121

4. Galvin SL, Ramage M, Mazure E, Coulson CC. The association of cannabis use late in pregnancy with engagement and retention in perinatal substance use disorder care for opioid use disorder: A cohort comparison. *J Subst Abuse Treat*. 2020;117. doi:10.1016/j.jsat.2020.108098

5. Austin AE, Naumann RB, Simmons E. Association of State Child Abuse Policies and Mandated Reporting Policies With Prenatal and Postpartum Care Among Women Who Engaged in Substance Use During Pregnancy. *JAMA Pediatr*. 2022;176(11):1123. doi:10.1001/jamapediatrics.2022.3396

6. Ellis JD, Cairncross M, Struble CA, Carr MM, Ledgerwood DM, Lundahl LH. Correlates of Treatment Retention and Opioid Misuse Among Postpartum Women in Methadone Treatment. *J Addict Med*. 2019;13(2):153-158. doi:10.1097/ADM.0000000000000467

7. Nielsen T, Bernson D, Terplan M, et al. Maternal and infant characteristics associated with maternal opioid overdose in the year following delivery. *Addiction*. 2020;115(2):291-301. doi:10.1111/add.14825

8. The Lived Experience of Postpartum Women Attending Outpatient Substance Treatment for Opioid or Heroin Use - Proulx - 2021 - Journal of Midwifery &amp; Women’s Health - Wiley Online Library. Accessed February 1, 2023. https://onlinelibrary.wiley.com/doi/10.1111/jmwh.13165

9. Altman MR, Busse M, Kim J, Ervin A, Unite M, Kantrowitz-Gordon I. Community-led Priority Setting for Opioid Use Disorder in Pregnancy and Parenting. *J Addict Med*. 2021;15(5):414-420. doi:10.1097/ADM.0000000000000783

10. Gruß I, Firemark A, Davidson A. Motherhood, substance use and peer support: Benefits of an integrated group program for pregnant and postpartum women. *J Subst Abuse Treat*. 2021;131:108450. doi:10.1016/j.jsat.2021.108450

11. Busse MM, Kim J, Unite M, Kantrowitz-Gordon I, Altman MR. Nurses’ Priorities for Improving Pregnancy and Birth Care for Individuals with Opioid use Disorder. *J Midwifery Womens Health*. 2021;66(5):656-663. doi:10.1111/jmwh.13267

12. Peacock-Chambers E, Paterno MT, Kiely D, Fioroni T, Byatt N, Friedmann PD. Engagement in perinatal outpatient services among women in recovery from opioid use disorders. *Subst Abuse*. 2021;42(4):1022-1029. doi:10.1080/08897077.2021.1904091

13. Schiff DM, Work EC, Muftu S, et al. “You have to take this medication, but then you get punished for taking it:” lack of agency, choice, and fear of medications to treat opioid use disorder across the perinatal period. *J Subst Abuse Treat*. 2022;139:108765. doi:10.1016/j.jsat.2022.108765

14. Mattocks KM, Clark R, Weinreb L. Initiation and Engagement with Methadone Treatment among Pregnant and Postpartum Women. *Womens Health Issues*. 2017;27(6):646-651. doi:10.1016/j.whi.2017.05.002

15. Adams ZM, Ginapp CM, Price CR, et al. “A good mother”: Impact of motherhood identity on women’s substance use and engagement in treatment across the lifespan. *J Subst Abuse Treat*. 2021;130:108474. doi:10.1016/j.jsat.2021.108474

16. Peacock-Chambers E, Feinberg E, Senn-McNally M, et al. Engagement in Early Intervention Services Among Mothers in Recovery From Opioid Use Disorders. *Pediatrics*. 2020;145(2). doi:10.1542/peds.2019-1957

17. Mattson NM, Ohlendorf JM. Engagement in Online Communities by New Mothers in Recovery from Opioid Use Disorder. *MCN Am J Matern Child Nurs*. 2023;48(2):82-87. doi:10.1097/NMC.0000000000000893

18. Goodman DJ, Saunders EC, Wolff KB. In their own words: a qualitative study of factors promoting resilience and recovery among postpartum women with opioid use disorders. *BMC Pregnancy Childbirth*. 2020;20:1-10. doi:10.1186/s12884-020-02872-5

19. Gray J, Saia K, Walley AY. 28-year-old Woman With Opioid Use Disorder Delivers Healthy Baby While in Custody: Addressing Forced Detox. *J Addict Med*. 2019;13(3):237-240. doi:10.1097/ADM.0000000000000468

20. Zipursky J, Juurlink DN. Opioid use in pregnancy: An emerging health crisis. *Obstet Med*. 2021;14(4):211-219. doi:10.1177/1753495X20971163

21. Martin CE, Terplan M, Krans EE. Pain, Opioids and Pregnancy: Historical Context and Medical Management. *Clin Perinatol*. 2019;46(4):833-847. doi:10.1016/j.clp.2019.08.013

22. Raffi ER, Gray J, Conteh N, Kane M, Cohen LS, Schiff DM. Low barrier perinatal psychiatric care for patients with substance use disorder: meeting patients across the perinatal continuum where they are. *Int Rev Psychiatry*. 2021;33(6):543-552. doi:10.1080/09540261.2021.1898351

23. Seghete KLM, Graham AM, Shank TM, et al. Advancing preventive interventions for pregnant women who are opioid using via the integration of addiction and mental health research. *Curr Addict Rep*. 2020;7(1):61-67. doi:10.1007/s40429-020-00296-x

24. Bryan MA, Smid MC, Cheng M, et al. Addressing opioid use disorder among rural pregnant and postpartum women: a study protocol. *Addict Sci Clin Pract*. 2020;15(1):33. doi:10.1186/s13722-020-00206-6

25. Hensel D, Helou NE, Zhang F, et al. The Impact of a Multidisciplinary Opioid Use Disorder Prenatal Clinic on Breastfeeding Rates and Postpartum Care. *Am J Perinatol*. Published online June 3, 2022. doi:10.1055/s-0042-1748526

26. Hodgins FE, Lang JM, Malseptic GG, Melby LH, Connolly KA. Coordinating Outpatient Care for Pregnant and Postpartum Women with Opioid Use Disorder: Implications from the COACHH Program. *Matern Child Health J*. 2019;23(5):585-591. doi:10.1007/s10995-018-2683-y

27. Rosenthal EW, Baxter JK. Obstetric management of women with opioid use disorder. *Semin Perinatol*. 2019;43(3):168-172. doi:10.1053/j.semperi.2019.01.006

28. Martinez A, Allen A. A review of nonpharmacological adjunctive treatment for postpartum women with opioid use disorder. *Addict Behav*. 2020;105:106323. doi:10.1016/j.addbeh.2020.106323

29. Collier KW, MacAfee LK, Kenny BM, Meyer MC. Does co-location of medication assisted treatment and prenatal care for women with opioid use disorder increase pregnancy planning, length of interpregnancy interval, and postpartum contraceptive uptake? *J Subst Abuse Treat*. 2019;98:73-77. doi:10.1016/j.jsat.2018.12.001

30. Forray A, Mele A, Byatt N, et al. Support Models for Addiction Related Treatment (SMART) for pregnant women: Study protocol of a cluster randomized trial of two treatment models for opioid use disorder in prenatal clinics. Washio Y, ed. *PLOS ONE*. 2022;17(1):e0261751. doi:10.1371/journal.pone.0261751

31. Cochran G, Smid MC, Krans EE, et al. A pilot multisite study of patient navigation for pregnant women with opioid use disorder. *Contemp Clin Trials*. 2019;87:105888. doi:10.1016/j.cct.2019.105888

32. Tzilos Wernette G, Plegue M, Mmeje O, et al. Reducing sexual health risks and substance use in the prenatal setting: A study protocol for a randomized controlled trial. *Contemp Clin Trials*. 2019;84:105827. doi:10.1016/j.cct.2019.105827

33. Guille C, McCauley JL, Moreland A. Leveraging Telehealth in the United States to Increase Access to Opioid Use Disorder Treatment in Pregnancy and Postpartum During the COVID-19 Pandemic. *Am J Psychiatry*. 2021;178(4):290-293. doi:10.1176/appi.ajp.2020.20060949

34. Crane D, Marcotte M, Applegate M, et al. A statewide quality improvement (QI) initiative for better health outcomes and family stability among pregnant women with opioid use disorder (OUD) and their infants. *J Subst Abuse Treat*. 2019;102:53-59. doi:10.1016/j.jsat.2019.04.010

35. Paterno MT, Jablonski L, Klepacki A, Friedmann PD. Evaluation of a Nurse-Led Program for Rural Pregnant Women With Opioid Use Disorder to Improve Maternal–Neonatal Outcomes. *J Obstet Gynecol Neonatal Nurs*. 2019;48(5):495-506. doi:10.1016/j.jogn.2019.07.002

36. Berger BO, Horton LG, Gemmill A, Strobino DM. Postpartum Care Visit Attendance Within 60 Days of Delivery Among Women With and Without Opioid Use During Pregnancy: An Analysis of Commercial Insurance Data. *Womens Health Issues*. 2023;33(1):67-76. doi:10.1016/j.whi.2022.08.005

37. Galvin SL, Ramage M, Leiner C, Sullivan MH, Fagan EB. A Cohort Comparison of Differences Between Regional and Buncombe County Patients of a Comprehensive Perinatal Substance Use Disorders Program in Western North Carolina. *N C Med J*. 2020;81(3):157-165. doi:10.18043/ncm.81.3.157

38. Cochran GT, Hruschak V, Abdullah W, et al. Optimizing Pregnancy Treatment Interventions for Moms (OPTI-Mom): A Pilot Study. *J Addict Med*. 2018;12(1):72-79. doi:10.1097/ADM.0000000000000370

39. Shepherd-Banigan M, Domino ME, Wells R, Rutledge R, Hillemeier MM, Van Houtven CH. Do Maternity Care Coordination Services Encourage Use of Behavioral Health Treatment among Pregnant Women on Medicaid? *Womens Health Issues*. 2017;27(4):449-455. doi:10.1016/j.whi.2017.02.006

40. Sweeney PJ, Schwartz RM, Mattis NG, Vohr B. The Effect of Integrating Substance Abuse Treatment With Prenatal Care on Birth Outcome. *J Perinatol*. 2000;20(4):219-224. doi:10.1038/sj.jp.7200357

41. Sherman BR, Sanders LM, Yearde J. Role-modeling healthy behavior: peer counseling for pregnant and postpartum women in recovery. *Womens Health Issues*. 1998;8(4):230-238. doi:10.1016/S1049-3867(98)00013-9
